# Supplementary material for: Experimental and theoretical investigations of isomerization reactions of ionized acetone and its dimer
Source: Royal Society of Chemistry journal article supplement (doi:10.1039/c1cp22953b), 2011-11-17
Supplement: c1cp22953b.pdf [file c1cp22953b.pdf]

## Supporting Information

### Experimental and theoretical investigations of isomerization reactions of ionized acetone and its dimer

Yoshiyuki Matsuda,<sup>\*a</sup> Kunihiro Hoki,<sup>†a</sup> Satoshi Maeda,<sup>bc</sup> Ken-ichi  
Hanaue,<sup>a</sup> Keisuke Ohta,<sup>a</sup> Keiji Morokuma,<sup>cd</sup> Naohiko Mikami,<sup>a</sup> and Asuka  
Fujii<sup>\*a</sup>

- <sup>a</sup> Department of Chemistry, Graduate School of Science, Tohoku University, Aramaki-Aoba, Aoba-ku, Sendai 980-8578, Japan  
E-mail: matsuda@m.tohoku.ac.jp (Y. Matsuda)  
asukafujii@m.tohoku.ac.jp (A. Fujii)
- <sup>b</sup> The Hakubi Center, Kyoto University, Kyoto 606-8302, Japan
- <sup>c</sup> Fukui Institute for Fundamental Chemistry, Kyoto University, Kyoto 606-8103, Japan
- <sup>d</sup> Department of Chemistry and Cherry L. Emerson Center for Scientific Computation, Emory University, Atlanta, GA 30322
- <sup>†</sup> Present address: Department of Communication Engineering and Informatics, University of Electro-Communications, 5-1 Chofugaoka 1-chome, Chofu, Tokyo 182-8585, Japan



## S2. Cartesian coordinates for the Franck-Condon structure and the dimer cation structures

Franck-Condon:

|   |           |           |           |
|---|-----------|-----------|-----------|
| C | -2.000546 | -1.279683 | 0.375760  |
| C | -1.658179 | -0.000076 | -0.336140 |
| C | -2.001298 | 1.279204  | 0.375986  |
| O | -1.103955 | 0.000175  | -1.413001 |
| H | -1.791537 | -2.133730 | -0.264119 |
| H | -3.048765 | -1.286631 | 0.681521  |
| H | -1.396081 | -1.345942 | 1.284385  |
| H | -1.791461 | 2.133553  | -0.263215 |
| H | -3.049951 | 1.286023  | 0.680290  |
| H | -1.398118 | 1.345020  | 1.285487  |
| C | 1.658179  | 0.000069  | 0.336140  |
| C | 2.001206  | -1.279179 | -0.376089 |
| C | 2.000636  | 1.279709  | -0.375658 |
| O | 1.103957  | -0.000232 | 1.413002  |
| H | 1.791330  | 2.133736  | 0.264149  |
| H | 1.396510  | 1.345911  | -1.284510 |
| H | 3.048971  | 1.286753  | -0.681027 |
| H | 1.791671  | -2.133547 | 0.263187  |
| H | 3.049742  | -1.285901 | -0.680791 |
| H | 1.397682  | -1.345052 | -1.285360 |

MIN1:

|   |           |           |           |
|---|-----------|-----------|-----------|
| C | 0.387594  | 2.664670  | 0.710578  |
| C | 0.540192  | 1.299452  | 0.168935  |
| C | 1.802269  | 0.940687  | -0.518513 |
| O | -0.424662 | 0.524260  | 0.339265  |
| H | -0.509816 | 2.765707  | 1.313812  |
| H | 1.279422  | 2.931654  | 1.283815  |
| H | 0.352167  | 3.363762  | -0.132348 |
| H | 1.669209  | 0.226329  | -1.326828 |
| H | 2.295960  | 1.840480  | -0.879914 |
| H | 2.464328  | 0.471849  | 0.218581  |
| C | -0.483775 | -1.082729 | -0.102405 |
| C | -1.101246 | -1.035980 | -1.494645 |
| C | -1.403274 | -1.615704 | 0.999646  |
| O | 0.674602  | -1.612011 | -0.047829 |
| H | -0.404673 | -0.621220 | -2.220093 |
| H | -1.345788 | -2.057600 | -1.782339 |
| H | -2.008209 | -0.435974 | -1.455723 |
| H | -0.902755 | -1.577368 | 1.964263  |
| H | -2.304468 | -1.006164 | 1.016695  |
| H | -1.647805 | -2.647579 | 0.754425  |

MIN2:

|   |           |           |           |
|---|-----------|-----------|-----------|
| C | -3.257494 | -0.770039 | 0.005005  |
| C | -1.969976 | -0.005374 | -0.006408 |
| C | -2.017514 | 1.483432  | 0.003704  |
| O | -0.928689 | -0.642642 | -0.012691 |
| H | -3.090835 | -1.831919 | 0.159752  |
| H | -3.909548 | -0.359213 | 0.778373  |
| H | -3.748527 | -0.605865 | -0.958551 |
| H | -1.077116 | 1.919129  | -0.314402 |
| H | -2.848122 | 1.830475  | -0.610307 |
| H | -2.227034 | 1.790707  | 1.033782  |
| C | 1.969956  | 0.005355  | -0.006457 |
| C | 3.257392  | 0.770173  | 0.005112  |
| C | 2.017681  | -1.483438 | 0.003678  |
| O | 0.928598  | 0.642493  | -0.012963 |
| H | 3.090585  | 1.832018  | 0.159948  |
| H | 3.909464  | 0.359359  | 0.778466  |
| H | 3.748485  | 0.606179  | -0.958444 |
| H | 1.077177  | -1.919284 | -0.313900 |
| H | 2.847964  | -1.830326 | -0.610879 |
| H | 2.227964  | -1.790728 | 1.033590  |

MIN3:

|   |           |           |           |
|---|-----------|-----------|-----------|
| C | -2.019177 | -1.483371 | -0.005715 |
| C | -1.970726 | 0.005492  | -0.002826 |
| C | -3.258012 | 0.770708  | 0.000874  |
| O | -0.929137 | 0.642145  | 0.007681  |
| H | -1.073802 | -1.917342 | -0.311063 |
| H | -2.839357 | -1.824798 | -0.636727 |
| H | -2.246846 | -1.798603 | 1.018074  |
| H | -3.092541 | 1.831337  | 0.165214  |
| H | -3.739034 | 0.614077  | -0.968952 |
| H | -3.918224 | 0.354483  | 0.764364  |
| C | 1.970726  | -0.005492 | 0.002826  |
| C | 2.019176  | 1.483371  | 0.005717  |
| C | 3.258013  | -0.770708 | -0.000875 |
| O | 0.929137  | -0.642146 | -0.007682 |
| H | 3.092542  | -1.831336 | -0.165217 |
| H | 3.739034  | -0.614078 | 0.968952  |
| H | 3.918225  | -0.354481 | -0.764364 |
| H | 1.073800  | 1.917342  | 0.311066  |
| H | 2.246844  | 1.798605  | -1.018072 |
| H | 2.839357  | 1.824798  | 0.636729  |

MIN4:

|   |           |           |           |
|---|-----------|-----------|-----------|
| C | 2.112449  | 1.474353  | -0.028249 |
| C | 2.168545  | 0.050319  | 0.001773  |
| C | 3.467154  | -0.656648 | 0.017437  |
| O | 1.110086  | -0.639824 | 0.015402  |
| H | 0.131995  | -0.089672 | 0.004011  |
| H | 1.160631  | 1.989222  | -0.039351 |
| H | 3.027520  | 2.050026  | -0.039951 |
| H | 3.324953  | -1.733101 | 0.045465  |
| H | 4.047311  | -0.379307 | -0.867329 |
| H | 4.052013  | -0.333492 | 0.883195  |
| C | -2.079961 | 0.010667  | -0.002065 |
| C | -2.209185 | -1.468878 | -0.022736 |
| C | -3.309031 | 0.837444  | 0.021206  |
| O | -0.977399 | 0.572419  | -0.004713 |
| H | -3.086013 | 1.883083  | -0.171587 |
| H | -3.765013 | 0.742431  | 1.012486  |
| H | -4.043151 | 0.456189  | -0.690613 |
| H | -1.263629 | -1.974390 | 0.157244  |
| H | -2.590674 | -1.762662 | -1.006081 |
| H | -2.957271 | -1.792630 | 0.702816  |

MIN5:

|   |           |           |           |
|---|-----------|-----------|-----------|
| C | 3.383587  | 0.814358  | -0.022792 |
| C | 2.187794  | 0.044741  | -0.004337 |
| C | 2.242883  | -1.437738 | 0.032029  |
| O | 1.098829  | 0.683587  | -0.019066 |
| H | 0.121357  | 0.087059  | -0.007417 |
| H | 3.318820  | 1.893649  | -0.047975 |
| H | 4.350558  | 0.331019  | -0.011775 |
| H | 1.254374  | -1.888984 | 0.027513  |
| H | 2.816513  | -1.801250 | -0.824621 |
| H | 2.786712  | -1.757172 | 0.925323  |
| C | -2.055648 | -0.022419 | 0.001663  |
| C | -3.275799 | -0.860786 | -0.024265 |
| C | -2.196147 | 1.455340  | 0.031126  |
| O | -0.948635 | -0.577415 | -0.000710 |
| H | -1.255792 | 1.969654  | -0.150449 |
| H | -2.575106 | 1.739641  | 1.018304  |
| H | -2.951050 | 1.776474  | -0.688449 |
| H | -3.042189 | -1.904739 | 0.165091  |
| H | -3.731663 | -0.767150 | -1.015832 |
| H | -4.014108 | -0.488549 | 0.687948  |

TS1:

|   |           |           |           |
|---|-----------|-----------|-----------|
| C | -2.850833 | -0.946927 | 0.006073  |
| C | -1.652534 | -0.057763 | 0.001861  |
| C | -1.888112 | 1.417731  | -0.012872 |
| O | -0.527126 | -0.542806 | 0.011526  |
| H | -2.566878 | -1.985013 | 0.155188  |
| H | -3.557632 | -0.629490 | 0.775511  |
| H | -3.370855 | -0.844822 | -0.950954 |
| H | -0.970387 | 1.981531  | -0.154463 |
| H | -2.607952 | 1.675584  | -0.792030 |
| H | -2.347880 | 1.710380  | 0.935406  |
| C | 1.691047  | 0.129343  | -0.004933 |
| C | 1.900103  | -0.602764 | -1.307441 |
| C | 1.899123  | -0.568065 | 1.319376  |
| O | 1.656079  | 1.343460  | -0.014748 |
| H | 1.592498  | 0.006101  | -2.152316 |
| H | 2.973227  | -0.809216 | -1.362628 |
| H | 1.336848  | -1.531652 | -1.252978 |
| H | 1.600953  | 0.066707  | 2.148362  |
| H | 1.323471  | -1.490696 | 1.289881  |
| H | 2.970190  | -0.783980 | 1.374413  |

TS2:

|   |           |           |           |
|---|-----------|-----------|-----------|
| C | -3.267110 | -0.727201 | -0.004278 |
| C | -1.956740 | -0.009101 | -0.001338 |
| C | -1.936677 | 1.483189  | 0.013467  |
| O | -0.935603 | -0.679415 | -0.012097 |
| H | -3.139083 | -1.805291 | -0.019414 |
| H | -3.826204 | -0.416382 | 0.882645  |
| H | -3.835884 | -0.392348 | -0.876134 |
| H | -1.405322 | 1.837610  | -0.871314 |
| H | -2.944419 | 1.887865  | 0.033392  |
| H | -1.374692 | 1.822682  | 0.884633  |
| C | 1.943237  | -0.000975 | -0.005282 |
| C | 3.220135  | 0.780731  | -0.003185 |
| C | 2.011302  | -1.488617 | 0.006942  |
| O | 0.893300  | 0.623296  | -0.005627 |
| H | 3.040330  | 1.840943  | 0.148279  |
| H | 3.881813  | 0.381805  | 0.768290  |
| H | 3.709139  | 0.619327  | -0.968249 |
| H | 1.076613  | -1.937700 | -0.309500 |
| H | 2.846226  | -1.826289 | -0.606354 |
| H | 2.225032  | -1.791426 | 1.037562  |

TS3:

|   |           |           |           |
|---|-----------|-----------|-----------|
| C | 1.899994  | -0.079897 | -0.005431 |
| C | 3.210351  | -0.659635 | -0.369363 |
| C | 1.684711  | 1.380904  | -0.127730 |
| O | 1.019587  | -0.857493 | 0.403877  |
| H | 3.295371  | -1.693587 | -0.047569 |
| H | 4.016473  | -0.048687 | 0.042674  |
| H | 3.309925  | -0.604370 | -1.459295 |
| H | 0.632613  | 1.649795  | -0.194828 |
| H | 2.235669  | 1.778233  | -0.979755 |
| H | 2.113012  | 1.850541  | 0.765917  |
| C | -2.038408 | 0.125701  | -0.022557 |
| C | -2.670758 | -1.095900 | -0.610872 |
| C | -1.264799 | 0.047142  | 1.222609  |
| O | -2.186221 | 1.236858  | -0.497154 |
| H | -3.571139 | -1.326178 | -0.035190 |
| H | -2.949675 | -0.919139 | -1.646239 |
| H | -1.992044 | -1.944985 | -0.526054 |
| H | -1.013142 | 1.005418  | 1.671789  |
| H | -1.598049 | -0.710661 | 1.928663  |
| H | -0.072480 | -0.381196 | 0.706167  |

TS4:

|   |           |           |           |
|---|-----------|-----------|-----------|
| C | 3.034839  | -1.091958 | 0.648076  |
| C | 2.276967  | -0.053349 | 0.021936  |
| C | 2.988991  | 1.010138  | -0.744843 |
| O | 1.037961  | -0.042961 | 0.140877  |
| H | -0.317417 | -0.376415 | -0.282213 |
| H | 2.519073  | -1.856218 | 1.213049  |
| H | 4.112777  | -1.124325 | 0.566295  |
| H | 2.283067  | 1.707738  | -1.186950 |
| H | 3.673259  | 1.550049  | -0.085107 |
| H | 3.603288  | 0.559314  | -1.528101 |
| C | -2.202991 | -0.031571 | -0.030655 |
| C | -1.960790 | 0.945375  | 1.044777  |
| C | -3.565180 | -0.345153 | -0.482873 |
| O | -1.259766 | -0.634623 | -0.597860 |
| H | -0.926588 | 1.279319  | 1.080617  |
| H | -2.206242 | 0.449993  | 1.992440  |
| H | -2.647829 | 1.787436  | 0.953999  |
| H | -3.589470 | -1.243794 | -1.093255 |
| H | -3.915851 | 0.504996  | -1.081134 |
| H | -4.244634 | -0.418323 | 0.367719  |
